# Supplementary material for: Transcriptional regulation of metabolism in disease: From transcription factors to epigenetics
Source: PeerJ. 2018 Jun 15;6:e5062. doi: 10.7717/peerj.5062 (PMC6005171; doi:10.7717/peerj.5062)
Supplement: Supplemental Information 1 [file peerj-06-5062-s001.xlsx]

## Sheet: Normalized publications per yea
Year	Epi+disease	Epi	Total pub/year	100,000s pub/year	Epigenetics + Disease	Epigenetics	Percentage of publications
2017	7152	11622	1277432	12.7743	559.873	909.794	0.615385
2016	6864	11095	1262974	12.6297	543.479	878.482	0.618657
2015	6482	10404	1253663	12.5366	517.045	829.888	0.62303
2014	5788	9555	1200951	12.0095	481.951	795.619	0.605756
2013	4879	8279	1146273	11.4627	425.64	722.254	0.589322
2012	4136	7095	1086013	10.8601	380.843	653.307	0.582946
2011	3520	6097	1018313	10.1831	345.67	598.735	0.577333
2010	3033	5205	940482	9.40482	322.494	553.44	0.582709
2009	2404	4153	875804	8.75804	274.491	474.193	0.578859
2008	2242	3709	835481	8.35481	268.348	443.936	0.604476
2007	1974	3228	785111	7.85111	251.429	411.152	0.611524
2006	1637	2741	746768	7.46768	219.211	367.048	0.597227
2005	1440	2389	699244	6.99244	205.937	341.655	0.602763
2004	1263	2051	638478	6.38478	197.814	321.233	0.615797
2003	1117	1833	593440	5.9344	188.225	308.877	0.609384
2002	876	1534	564364	5.64364	155.219	271.81	0.571056
2001	715	1279	546637	5.46637	130.8	233.976	0.55903
2000	548	1046	531693	5.31693	103.067	196.73	0.523901
1999	436	839	493173	4.93173	88.4071	170.123	0.519666
1998	332	750	473925	4.73925	70.0533	158.253	0.442667
1997	341	674	455733	4.55733	74.8245	147.894	0.505935
1996	203	441	458190	4.5819	44.3048	96.2483	0.460317
1995	113	272	448622	4.48622	25.1882	60.6301	0.415441
1994	100	243	437919	4.37919	22.8353	55.4897	0.411523
1993	104	250	426923	4.26923	24.3604	58.5586	0.416
1992	93	198	417445	4.17445	22.2784	47.4314	0.469697
1991	78	198	412613	4.12613	18.9039	47.9869	0.393939
1990	60	195	410280	4.1028	14.6242	47.5285	0.307692
